# Supplementary material
Source: publisher figshare collection journal article supplement (https://asha.figshare.com/articles/dataset/_/27091879)
Supplement: Supplementary file 2 [file 1]

## **Supplemental Material S4.** Procedural reliability checklist for baseline phase: commenting behavior.

|                                                 |
|-------------------------------------------------|
| <b>Code Name:</b>                               |
| <b>Peer/Experimenter (Circle/Highlight one)</b> |
| <b>Coder's Name:</b>                            |
| <b>Date:</b>                                    |

*Directions: Place a check in the box if the step was completed. Place an X in the box if the step was not completed.*

### **Prior to Beginning of Session**

- ☐ iPad opened to home page on Proloquo2Go
- ☐ Peer or experimenter starts session by using aided modeling to state "Let's play a game"
- ☐ Peer/experimenter selects participant's preferred game/activity

### **Probe #1**

- ☐ Peer/experimenter takes a turn
- ☐ Peer/experimenter waits 5 s between turns without giving cues.

### **Probe #2**

- ☐ Peer/experimenter takes a turn
- ☐ Peer/experimenter waits 5 s between turns without giving cues.

### **Probe #3**

- ☐ Peer/experimenter takes a turn
- ☐ Peer/experimenter waits 5 s between turns without giving cues.

### **Probe #4**

- ☐ Peer/experimenter takes a turn
- ☐ Peer/experimenter waits 5 s between turns without giving cues.

### **Probe #5**

- ☐ Peer/experimenter takes a turn
- ☐ Peer/experimenter waits 5 s between turns without giving cues.

### **End of Session**

- ☐ Session lasted 20-30 minutes
- ☐ No cues were given for the duration of the sessions
- ☐ Five probes were given targeting commenting
