# Supplementary material
Source: publisher figshare collection journal article supplement (https://asha.figshare.com/articles/dataset/_/27091879)
Supplement: Supplementary file 3 [file 1]

**Supplemental Material S9.** Procedural reliability checklist for generalization phase: answering questions behavior.

|                                                 |
|-------------------------------------------------|
| <b>Code Name:</b>                               |
| <b>Peer/Experimenter (Circle/Highlight one)</b> |
| <b>Coder's Name:</b>                            |
| <b>Date:</b>                                    |

*Directions: Place a check in the box if the step was completed. Place an X in the box if the step was not completed.*

**Prior to Beginning of Session**

- ☐ iPad opened to home page on Proloquo2Go
- ☐ Peer participated

**Probe #1 (How are you?)**

- ☐ Peer starts session by using aided modeling to state "Hi, how are you?"
- ☐ Peer waits 5 s without giving cues
- ☐ Peer selects participant's preferred game/activity

**Probe #2 (Do you like this game)**

- ☐ Peer uses aided modeling to ask "do you like this game?"
- ☐ Peer waits 5 s without giving cues

*Did the participant answer yes or no respond? Go directly to probe labeled probe #3 or 4* ☐

*Did the participant answer no? See steps below labeled option for probe 3.* ☐

**Option for Probe #3**

- ☐ Peer selects another preferred activity.
- ☐ Peer uses aided modeling to ask "do you like this game?"
- ☐ Peer waits 5 s without giving cues

**Probe #3 or 4**

*Highlight question asked*

- ☐ Peer uses aided modeling to ask "are you having fun?" or "is it my turn?"
- ☐ Peer waits 5 s without giving cues

**Probe #4 or 5**

*Highlight question asked*

- ☐ Peer uses aided modeling to ask "are you having fun?" or "is it my turn?"
- ☐ Peer waits 5 s without giving cues

**Probe #5 (if needed)**

*Highlight question asked*

- ☐ Peer uses aided modeling to ask "are you having fun?" or "is it my turn"
- ☐ Peer waits 5 s without giving cues

**End of Session**

- ☐ Session lasted 20-30 minutes
- ☐ No cues were given for the duration of the sessions
- ☐ Five probes were given targeting answering questions
