# Supplementary material
Source: publisher figshare collection journal article supplement (https://asha.figshare.com/articles/dataset/_/27091879)
Supplement: Supplementary file 9 [file 1]

**Supplemental Material S5.** Procedural reliability checklist for intervention phase: initiating requests behavior.

|                      |
|----------------------|
| <b>Code Name:</b>    |
| <b>Coder's Name:</b> |
| <b>Date:</b>         |

*Directions: Place a check in the box if the step was completed. Place an X in the box if the step was not completed.*

**Prior to Beginning of Session**

☐ iPad opened to home page on Proloquo2Go

**Session Intro**

☐ Peer or experimenter starts session by using aided modeling to state "I want to play a game"

☐ Peer/experimenter selects participant's preferred game/activity

**Probe #1**

☐ Peer/experimenter takes one turn

☐ Peer/experimenter waits 5 s without giving cues

☐ Peer/experimenter gives participant turn irrespective if the peer responds correct/incorrect

☐ Peer/experimenter uses aided modeling to state "I want ACTION"

**Probe #2**

☐ Peer/experimenter takes one turn

☐ Peer/experimenter waits 5 s without giving cues

☐ Peer/experimenter gives participant turn irrespective if the peer responds correct/incorrect

☐ Peer/experimenter uses aided modeling to state "I want ACTION"

**Probe #3**

☐ Peer/experimenter takes one turn

☐ Peer/experimenter waits 5 s without giving cues

☐ Peer/experimenter gives participant turn irrespective if the peer responds correct/incorrect

☐ Peer/experimenter uses aided modeling to state "I want ACTION"

**Probe #4**

☐ Peer/experimenter takes one turn

☐ Peer/experimenter waits 5 s without giving cues

☐ Peer/experimenter gives participant turn irrespective if the peer responds correct/incorrect

☐ Peer/experimenter uses aided modeling to state "I want ACTION"



Supplemental material, Chavers Edgar et al., "Socio-Communicative Behaviors Involving Minimally Speaking Autistic Preschoolers and Their Typically Developing Peers: Effects of an Augmentative and Alternative Communication Intervention Package," *JSLHR*,  
[https://doi.org/10.1044/2024\\_JSLHR-24-00210](https://doi.org/10.1044/2024_JSLHR-24-00210)
